# Supplementary material
Source: PubMed Central journal article supplement (PMC3188590)
Supplement: supp_dev.051052_DEV051052SuppTableS1.pdf [file supp_dev.051052_DEV051052SuppTableS1.pdf]

**Table S1. Oligonucleotide sequences**

| Oligonucleotide   | Sequence (5'-3')                                                                                                       |
|-------------------|------------------------------------------------------------------------------------------------------------------------|
| I56i-1.for        | CTCGAGAAAAATGTTTTCTTTCTT                                                                                               |
| I56i-316.rev      | GCTTTTTAGTATTA AAAAGTG                                                                                                 |
| I56i SNP.for      | TTAAATGCAGCC <u>G</u> TAATTAGAGTAA                                                                                     |
| I56i-436.rev      | CTCGAGGCATTATAATTTTGGTTAAT                                                                                             |
| zI56i-187.for     | <b>CGGAATTC</b> TTTTTTCCATTCTCATAAAT                                                                                   |
| zI56i-316.rev     | <b>CGGTACCG</b> CCTTTTAGTATTA AAAAGTG                                                                                  |
| mI56i FP3.for     | AAATGCAGCCATAATTAGAGT                                                                                                  |
| mI56i FP3.rev     | ACTCTAATTATGGCTGCATT                                                                                                   |
| mI56i FP3 SNP.for | AAATGCAGCC <u>G</u> TAATTAGAGT                                                                                         |
| mI56i FP3 SNP.rev | ACTCTAATT <u>A</u> CGGCTGCATT                                                                                          |
| mI56i FP3-FP5.for | CTCTTAAATGCAGCC <b>ATAATTA</b> GAGTAATTTTTCATGTAGCCCGCTGATTACAG-<br>CGTTTTTACCGTCAAAG <b>ATAATTA</b> CCTGTAATTTTCTTCCA |
| mI56i FP3-FP5.rev | TGGAAGAAAATTACAGG <b>TAATTAT</b> CCTTTGACGGTAAAAACGCTGTAATCAGCG-<br>GGCTACATGAAAAATTACT <b>TAATTAT</b> GGCTGCATTTAAGAG |
| I56i FP3 X3.for   | CCCC <b>ATAATT</b> CCCC <b>ATAATT</b> CCCC <b>ATAATT</b> CCCC                                                          |
| I56i FP3 X3.rev   | GGGG <b>AATTAT</b> GGGG <b>AATTAT</b> GGGG <b>AATTAT</b> GGGG                                                          |
| vI56i FP3 X3.for  | CCCC <u>GTAATT</u> CCCC <u>GTAATT</u> CCCC <u>GTAATT</u> CCCC                                                          |
| vI56i FP3 X3.rev  | GGGG <b>AATTAC</b> GGGG <b>AATTAC</b> GGGG <b>AATTAC</b> GGGG                                                          |

*Eco*RI and *Kpn*I restriction sites are in bold. SNP is in bold and underlined. Dlx binding sites are in bold italic.
