# Supplementary material
Source: PubMed Central journal article supplement (PMC3188590)
Supplement: supp_dev.051052_DEV051052SuppTableS2.pdf [file supp_dev.051052_DEV051052SuppTableS2.pdf]

**Table S2. List of purified proteins identified by mass spectrometry analysis.** Proteins are listed in a decreasing order according to the number of independent peptides identified from each protein.

| Protein Description                                                                           | Gene Name | Swissprot Accession Number | Molecular Weight | Unique Peptides |
|-----------------------------------------------------------------------------------------------|-----------|----------------------------|------------------|-----------------|
| Putative uncharacterized protein (99% similarity with mouse GTF2I)                            | GTF2I     | Q3UHU8                     | 108 kDa          | 49              |
| DNA topoisomerase 2-beta                                                                      | TOP2B     | Q64511                     | 182 kDa          | 35              |
| Vimentin                                                                                      | VIM       | P20152                     | 54 kDa           | 34              |
| Putative uncharacterized protein (Heterogeneous nuclear ribonucleoprotein U)                  | HNRNPU    | Q3TVV6                     | 88 kDa           | 33              |
| Putative uncharacterized protein (Poly(ADP-ribose) polymerase-1)                              | PARP1     | Q3TX36                     | 113 kDa          | 31              |
| DNA mismatch repair protein Msh2                                                              | MSH2      | P43247                     | 104 kDa          | 27              |
| Splicing factor proline/glutamine rich (Polypyrimidine tract binding protein associated)      | SFPQ      | Q4KM71                     | 75 kDa           | 21              |
| MutS homolog 3 (E. coli)                                                                      | MSH3      | B2RWY6                     | 123 kDa          | 18              |
| Actin, cytoplasmic 1                                                                          | ACTB      | P48975                     | 42 kDa           | 17              |
| DEAD (Asp-Glu-Ala-Asp) box polypeptide 5                                                      | DDX5      | A1L333                     | 69 kDa           | 17              |
| Putative uncharacterized protein ((Heterogeneous nuclear ribonucleoprotein M)                 | HNRNPM    | Q3TW40                     | 74 kDa           | 17              |
| ATP-dependent RNA helicase A                                                                  | DHX9      | O70133                     | 149 kDa          | 17              |
| Alpha-internexin                                                                              | INA       | P46660                     | 56 kDa           | 15              |
| Superkiller viralicidic activity 2-like 2                                                     | SKIV2L2   | Q9CZU3                     | 118 kDa          | 15              |
| Putative uncharacterized protein (Non-POU domain-containing octamer-binding protein )         | NONO      | Q3TFC2                     | 54 kDa           | 14              |
| Elongation factor Tu GTP binding domain containing 2                                          | EFTUD2    | A2AH85                     | 109 kDa          | 13              |
| Heat shock cognate 71 kDa protein                                                             | HSPA8     | P19378                     | 71 kDa           | 13              |
| Thymopoiectin                                                                                 | TMPO      | B2RUB9                     | 75 kDa           | 13              |
| DEAD (Asp-Glu-Ala-Asp) box polypeptide 21                                                     | DDX21     | Q3TVJ3                     | 94 kDa           | 12              |
| ATP-dependent DNA helicase 2 subunit 2                                                        | XRCC5     | P27641                     | 83 kDa           | 11              |
| Putative uncharacterized protein (Pre-mRNA-processing factor 6)                               | PRPF6     | Q3ULJ7                     | 107 kDa          | 11              |
| Putative uncharacterized protein (Matrin 3)                                                   | MATR3     | Q3TTX0                     | 95 kDa           | 10              |
| 40S ribosomal protein S3                                                                      | RPS3      | P62908                     | 27 kDa           | 10              |
| Putative uncharacterized protein (DEAD (Asp-Glu-Ala-Asp) box polypeptide 17)                  | DDX17     | Q3U741                     | 73 kDa           | 9               |
| Tubulin beta-5 chain                                                                          | TUBB5     | P69893                     | 50 kDa           | 9               |
| Splicing factor 3B subunit 3                                                                  | SF3B3     | Q921M3                     | 136 kDa          | 9               |
| SWI/SNF-related matrix-associated actin-dependent regulator of chromatin subfamily A member 5 | SMARCA5   | Q91ZW3                     | 122 kDa          | 9               |
| AIF-C1 (Heterogeneous nuclear ribonucleoprotein A/B)                                          | HNRNPAB   | O88311                     | 36 kDa           | 8               |
| Tubulin alpha-1A chain                                                                        | TUBA1A    | P68362                     | 50 kDa           | 8               |
| DNA topoisomerase II, alpha isozyme                                                           | TOP2A     | Q01320                     | 173 kDa          | 8               |
| 60S acidic ribosomal protein P0                                                               | RPLP0     | P14869                     | 34 kDa           | 8               |
| ATP-dependent RNA helicase DDX3X                                                              | DDX3X     | Q62167                     | 73 kDa           | 8               |
| Nuclear factor 90                                                                             | IIF3      | Q45VK5                     | 76 kDa           | 8               |
| Dhx36 protein                                                                                 | DHX36     | B2RQS6                     | 114 kDa          | 8               |
| Myb-binding protein 1A                                                                        | MYBBP1A   | Q7TPV4                     | 152 kDa          | 8               |
| RAT Pyruvate carboxylase, mitochondrial                                                       | PC        | P52873                     | 130 kDa          | 8               |
| Uncharacterized protein C17orf85 homolog                                                      | Unknown   | Q8BZR9                     | 70 kDa           | 7               |
| Histone deacetylase 6                                                                         | HDAC6     | B1AUA6                     | 126 kDa          | 7               |
| DNA topoisomerase 1                                                                           | TOP1      | Q04750                     | 91 kDa           | 7               |
| Poly(rC)-binding protein 1                                                                    | PCBP1     | P60335                     | 37 kDa           | 7               |
| THO complex subunit 1                                                                         | THOC1     | Q8R3N6                     | 75 kDa           | 7               |
| Methylcrotonoyl-CoA carboxylase subunit alpha, mitochondrial                                  | MCCC1     | Q99MR8                     | 79 kDa           | 7               |
| Heterogeneous nuclear ribonucleoprotein D0                                                    | HNRPD     | Q60668                     | 38 kDa           | 6               |
| THO complex subunit 4                                                                         | THOC4     | O08583                     | 27 kDa           | 6               |
| Histone H1.2                                                                                  | HIST1H1C  | P15864                     | 21 kDa           | 6               |
| Putative uncharacterized protein (RNA binding motif protein X chromosome retrogene)           | RBMXRT    | Q91VM5                     | 42 kDa           | 6               |
| Heterogeneous nuclear ribonucleoprotein K                                                     | HNRNPK    | B2M1R6                     | 49 kDa           | 6               |
| RNA-binding protein 14                                                                        | RBM14     | Q8C2Q3                     | 69 kDa           | 6               |
| Putative uncharacterized protein (Heterogeneous nuclear ribonucleoprotein R)                  | HNRNPR    | Q3U8W9                     | 71 kDa           | 6               |
| Splicing factor 3B subunit 1                                                                  | SF3B1     | Q99NB9                     | 146 kDa          | 6               |
| Poly(U)-binding-splicing factor PUF60                                                         | PUF60     | Q3UEB3                     | 60 kDa           | 6               |
| THO complex 2                                                                                 | THOC2     | B1AZI6                     | 183 kDa          | 6               |
| Polyadenylate-binding protein 1                                                               | PABPC1    | P29341                     | 71 kDa           | 6               |
| Myosin-Ib                                                                                     | MYO1B     | P46735                     | 129 kDa          | 6               |
| Putative pre-mRNA-splicing factor ATP-dependent RNA helicase DHX15                            | DHX15     | O35286                     | 91 kDa           | 6               |
| 60S ribosomal protein L6                                                                      | RPL6      | P47911                     | 34 kDa           | 6               |
| Nucleolar protein 5A                                                                          | NOL5A     | Q9D6Z1                     | 64 kDa           | 6               |
| Aquarius                                                                                      | AQR       | A2AQA7                     | 162 kDa          | 6               |
| Putative uncharacterized protein (DNA-directed RNA polymerase I subunit RPA1)                 | RPA1      | Q3U8B3                     | 71 kDa           | 6               |
| Putative uncharacterized protein (RuvB-like 2 )                                               | RUVBL2    | Q3UXP2                     | 51 kDa           | 6               |
| 60S ribosomal protein L23a                                                                    | RPL23A    | P62751                     | 18 kDa           | 6               |

|                                                                                                      |          |               |         |   |
|------------------------------------------------------------------------------------------------------|----------|---------------|---------|---|
| Splicing factor, arginine/serine-rich 1                                                              | SFRS1    | Q6PDM2        | 28 kDa  | 5 |
| Homeobox protein DLX-1                                                                               | DLX1     | Q64317        | 27 kDa  | 5 |
| Heterogeneous nuclear ribonucleoprotein H                                                            | HNRNPH1  | O35737        | 49 kDa  | 5 |
| Spliceosome RNA helicase Bat1                                                                        | BAT1     | Q9Z1N5        | 49 kDa  | 5 |
| 60S ribosomal protein L11                                                                            | RPL11    | Q6QMZ8        | 20 kDa  | 5 |
| MKIAA0670 protein (Apoptotic chromatin condensation inducer in the nucleus)                          | ACIN1    | Q80TU6        | 143 kDa | 5 |
| Eukaryotic initiation factor 4A-III                                                                  | EIF4A3   | Q91VC3        | 47 kDa  | 5 |
| Guanine nucleotide-binding protein subunit beta-2-like 1                                             | GNB2L1   | P68040        | 35 kDa  | 5 |
| Cpsf1 protein (Cleavage and polyadenylation specificity factor subunit 1)                            | CPSF1    | B5DEL2        | 161 kDa | 5 |
| DNA ligase 3                                                                                         | LIG3     | P97386        | 113 kDa | 5 |
| Upstream binding transcription factor, RNA polymerase I                                              | UBTF     | A2AWT5        | 89 kDa  | 5 |
| Heat shock protein HSP 90-beta                                                                       | HSP90AB1 | P34058        | 83 kDa  | 5 |
| rRNA 2'-O-methyltransferase fibrillarin                                                              | FBL      | P22509        | 34 kDa  | 5 |
| Serine/threonine-protein kinase TAO2                                                                 | TAOK2    | Q6ZQ29        | 120 kDa | 5 |
| Cleavage and polyadenylation specificity factor subunit 2                                            | CPSF2    | O35218        | 88 kDa  | 5 |
| Putative uncharacterized protein (Splicing factor 3b, subunit 2)                                     | SF3B2    | Q3UAI4        | 98 kDa  | 5 |
| Putative uncharacterized protein (Splicing factor 3 subunit 1)                                       | SF3A1    | Q3TVM1        | 89 kDa  | 5 |
| Putative uncharacterized protein (Transcription intermediary factor 1-beta)                          | TRIM28   | Q3UDN8        | 69 kDa  | 5 |
| Putative uncharacterized protein (Replication factor C subunit 4)                                    | RFC4     | Q3UI84        | 41 kDa  | 5 |
| Neurofilament medium polypeptide                                                                     | NEFM     | P08553        | 96 kDa  | 5 |
| Nucleophosmin                                                                                        | NPM1     | P13084        | 33 kDa  | 4 |
| Putative uncharacterized protein (H/ACA ribonucleoprotein complex subunit 1)                         | GAR1     | Q3TKG5        | 24 kDa  | 4 |
| Putative uncharacterized protein (Polymerase delta-interacting protein 3)                            | POLDIP3  | Q3TJ78        | 47 kDa  | 4 |
| Acetyl-CoA carboxylase 1                                                                             | ACACA    | P11497        | 265 kDa | 4 |
| Regulator of nonsense transcripts 1                                                                  | RENT1    | Q9EPU0        | 124 kDa | 4 |
| Putative uncharacterized protein (Heterogeneous nuclear ribonucleoprotein C)                         | HNRNPC   | Q3U6P5        | 37 kDa  | 4 |
| General transcription factor IIIC, polypeptide 4                                                     | GTF3C4   | Q148Y1        | 92 kDa  | 4 |
| Putative uncharacterized protein (Staphylococcal nuclease domain-containing protein 1)               | SND1     | Q3TW51        | 102 kDa | 4 |
| 60S ribosomal protein L4                                                                             | RPL4     | Q9D8E6        | 47 kDa  | 4 |
| Paraspeckle component 1                                                                              | PSPC1    | Q4KLH4        | 59 kDa  | 4 |
| Myosin regulatory light chain RLC-A                                                                  | RLC-A    | P13832        | 20 kDa  | 4 |
| RNA-binding protein 27                                                                               | RBM27    | Q5SFM8        | 119 kDa | 4 |
| Polypyrimidine tract-binding protein 2                                                               | PTBP2    | Q91Z31        | 57 kDa  | 4 |
| RNA binding motif protein 15                                                                         | RBM15    | Q0VBL3        | 106 kDa | 4 |
| Putative uncharacterized protein (Caprin-1)                                                          | CAPRIN1  | Q3UFZ6        | 38 kDa  | 4 |
| RAT Cell division cycle 5-related protein                                                            | CDC5L    | O08837        | 92 kDa  | 4 |
| Activating signal cointegrator 1 complex subunit 3-like 1                                            | SNRNP200 | Q6P4T2        | 245 kDa | 4 |
| Nucleolin                                                                                            | NCL      | P09405        | 77 kDa  | 4 |
| Putative uncharacterized protein (Oligonucleotide/oligosaccharide-binding fold-containing protein 1) | OBFC1    | Q3TPH0        | 43 kDa  | 4 |
| Laminin receptor                                                                                     | RPSA     | B2CY77        | 33 kDa  | 3 |
| Putative uncharacterized protein (Interleukin enhancer-binding factor 2 )                            | IIF2     | Q3UXI9        | 43 kDa  | 3 |
| RNA-binding protein 25                                                                               | RBM25    | B2RY56        | 100 kDa | 3 |
| 60S ribosomal protein L12                                                                            | RPL12    | P23358        | 18 kDa  | 3 |
| Homeobox protein DLX-5                                                                               | DLX5     | P50575        | 31 kDa  | 3 |
| 60S ribosomal protein L13                                                                            | RPL13    | P47963        | 24 kDa  | 3 |
| Poly(RC) binding protein 2                                                                           | PCBP2    | B2M1R7        | 40 kDa  | 3 |
| RNA binding motif protein 39                                                                         | RBM39    | A6QRH4        | 37 kDa  | 3 |
| PREDICTED: hypothetical protein                                                                      | Unknown  | UPI0000193CBE | 179 kDa | 3 |
| Zinc finger CCHC domain-containing protein 8                                                         | ZCCHC8   | Q9CYA6        | 78 kDa  | 3 |
| 60S ribosomal protein L7                                                                             | RPL7     | P14148        | 31 kDa  | 3 |
| ATP-dependent DNA helicase 2 subunit 1                                                               | XRCC6    | P23475        | 69 kDa  | 3 |
| MutS homolog 6 (E. coli)                                                                             | MSH6     | Q6GTK8        | 151 kDa | 3 |
| Putative uncharacterized protein (Symplekin)                                                         | SYMPK    | Q3TN10        | 119 kDa | 3 |
| Propionyl-CoA carboxylase alpha chain, mitochondrial                                                 | PCCA     | Q91ZA3        | 80 kDa  | 3 |
| Methylcrotonoyl-CoA carboxylase beta chain, mitochondrial                                            | MCCC2    | Q3ULD5        | 61 kDa  | 3 |
| Histone H1.1                                                                                         | HIST1H1A | P43275        | 22 kDa  | 3 |
| Putative uncharacterized protein (60S ribosomal protein L24)                                         | RPL24    | Q3UW40        | 18 kDa  | 3 |
| Thyroid hormone receptor-associated protein 3                                                        | THRAP3   | Q569Z6        | 108 kDa | 3 |
| Nol5 protein (Nucleolar protein 58)                                                                  | NOL5     | Q5PPK6        | 50 kDa  | 3 |
| U4/U6.U5 tri-snRNP-associated protein 1                                                              | SART1    | Q9Z315        | 91 kDa  | 3 |
| Splicing factor 3A subunit 3                                                                         | SF3A3    | Q9D554        | 59 kDa  | 3 |
| Mta1 protein (Metastasis-associated protein MTA1)                                                    | MTA1     | Q2KHS8        | 79 kDa  | 3 |

|                                                                             |          |          |         |   |
|-----------------------------------------------------------------------------|----------|----------|---------|---|
| Heterogeneous nuclear ribonucleoprotein F                                   | HNRNPF   | Q9Z2X1   | 46 kDa  | 3 |
| RuvB-like 1                                                                 | RUVBL1   | P60122   | 50 kDa  | 3 |
| ELAV (Embryonic lethal, abnormal vision, Drosophila)-like 1 (Hu antigen R)  | ELAV1    | B5DF91   | 36 kDa  | 3 |
| Prp19 beta protein (Pre-mRNA-processing factor 19)                          | PRPF19   | Q4ADG5   | 57 kDa  | 3 |
| Putative uncharacterized protein (Replication factor C subunit 2)           | RFC2     | Q9D0K3   | 39 kDa  | 3 |
| LIM/homeobox protein Lhx2                                                   | LHX2     | Q9Z0S2   | 44 kDa  | 3 |
| Pcid2 protein (PCI domain-containing protein 2)                             | PCID2    | A0JLQ7   | 47 kDa  | 3 |
| DEAD (Asp-Glu-Ala-Asp) box polypeptide 50                                   | DDX50    | Q5BKP5   | 82 kDa  | 3 |
| S1 RNA-binding domain-containing protein 1                                  | SRBD1    | Q497V5   | 114 kDa | 3 |
| Ddx23 protein                                                               | DDX23    | B5DFJ3   | 93 kDa  | 3 |
| WD repeat-containing protein 82                                             | WDR82    | Q8BFQ4   | 35 kDa  | 3 |
| DIM1 dimethyladenosine transferase 1-like (S. cerevisiae)                   | DIMT1L   | B0BN90   | 35 kDa  | 3 |
| N-methylpurine-DNA glycosylase                                              | MPG      | A2AVE7   | 36 kDa  | 3 |
| Ribosomal protein L18                                                       | RPL18    | Q0QEW6   | 19 kDa  | 3 |
| Daxx protein (Death domain-associated protein 6)                            | DAXX     | A1A558   | 81 kDa  | 3 |
| Ribosomal protein S8                                                        | RPS8     | Q5M9L9   | 24 kDa  | 3 |
| Far upstream element-binding protein 2                                      | KHSRP    | Q99PF5   | 74 kDa  | 3 |
| Putative uncharacterized protein (SWI/SNF complex subunit SMARCC2)          | SMARCC2  | Q3UID0   | 125 kDa | 3 |
| Putative uncharacterized protein (Myelin expression factor 2)               | MYEF2    | A7UQY4   | 57 kDa  | 3 |
| 3-alpha,7-alpha,12-alpha-trihydroxy-5-beta-cholest-24-enoyl-CoA hydratase   | HSD17B4  | P51660   | 79 kDa  | 3 |
| Insulin-like growth factor 2 mRNA-binding protein 1                         | IGF2BP1  | O88477   | 63 kDa  | 3 |
| DEAH (Asp-Glu-Ala-His) box polypeptide 35                                   | DHX35    | A2ACQ1   | 79 kDa  | 3 |
| Putative uncharacterized protein (Nuclear RNA export factor 1)              | NXF1     | Q3TJA5   | 70 kDa  | 3 |
| Lysine-specific histone demethylase 1                                       | AOF2     | A3KG93   | 95 kDa  | 3 |
| Ubiquitin specific protease 39 (Predicted), isoform CRA_b                   | USP39    | B2GV41   | 65 kDa  | 3 |
| Keratin, type II cytoskeletal 1                                             | KRT1     | Q6IMF3   | 65 kDa  | 2 |
| Splicing factor, arginine/serine-rich 3                                     | SFRS3    | P84104   | 19 kDa  | 2 |
| Mitogen-activated protein kinase kinase kinase kinase 4                     | MAP4K4   | P97820   | 141 kDa | 2 |
| Elongation factor 1-alpha 1                                                 | EEF1A1   | P10126   | 50 kDa  | 2 |
| KH domain-containing, RNA-binding, signal transduction-associated protein 1 | KHDRBS1  | Q60749   | 48 kDa  | 2 |
| ELAV (Embryonic lethal, abnormal vision, Drosophila)-like 4 (Hu antigen D)  | ELAVL4   | A2A9R6   | 41 kDa  | 2 |
| Transcriptional activator protein Pur-beta                                  | PURB     | O35295   | 34 kDa  | 2 |
| Tubulin beta-2B chain                                                       | TUBB2B   | Q9CWF2   | 50 kDa  | 2 |
| RCG26118, isoform CRA_a                                                     | SNRPB    | B0BN51   | 24 kDa  | 2 |
| Keratin, type II cytoskeletal 73                                            | KRT73    | Q6IG03   | 60 kDa  | 2 |
| Single-stranded DNA binding protein 3                                       | SSBP3    | B1AS36   | 38 kDa  | 2 |
| Putative ATP-dependent RNA helicase DHX29                                   | DHX29    | Q6PGC1   | 154 kDa | 2 |
| RNA-binding protein FUS                                                     | FUS      | P56959   | 53 kDa  | 2 |
| Ldb1 protein (LIM domain-binding protein 1)                                 | LDB1     | B2RYF3   | 52 kDa  | 2 |
| Putative uncharacterized protein (TAR DNA binding protein)                  | TARDBP   | Q3U591   | 45 kDa  | 2 |
| 60S ribosomal protein L10a                                                  | RPL10A   | P53026   | 25 kDa  | 2 |
| Histone H1.5                                                                | HIST1H1B | P43276   | 23 kDa  | 2 |
| Replication factor C (Activator 1) 5 (Predicted)                            | RFC5     | B5DF29   | 38 kDa  | 2 |
| Hdac2 protein (Histone deacetylase 2)                                       | HDAC2    | B1WBV8   | 61 kDa  | 2 |
| DNA-directed RNA polymerase II subunit RPB2                                 | POLR2B   | Q8CFI7   | 134 kDa | 2 |
| Putative uncharacterized protein (ATP-dependent RNA helicase DDX1)          | DDX1     | Q3V1Z7   | 83 kDa  | 2 |
| Putative uncharacterized protein (SMARCA4)                                  | SMARCA4  | Q3TKT4   | 181 kDa | 2 |
| Splicing factor, arginine/serine-rich 7                                     | SFRS7    | Q8BL97   | 31 kDa  | 2 |
| Structural maintenance of chromosomes 1A                                    | SMC1A    | A2AFQ5   | 143 kDa | 2 |
| Cell division cycle and apoptosis regulator protein 1                       | CCAR1    | Q8CH18-2 | 36 kDa  | 2 |
| Serine/threonine-protein kinase VRK3                                        | VRK3     | Q8K3G5   | 51 kDa  | 2 |
| Crooked neck-like protein 1                                                 | CRNKL1   | P63154   | 83 kDa  | 2 |
| Pre-mRNA-processing factor 40 homolog A                                     | PRPF40A  | Q9R1C7   | 108 kDa | 2 |
| Importin subunit beta-1                                                     | KPNB1    | P52296   | 97 kDa  | 2 |
| Putative uncharacterized protein (Actin-like protein 6A)                    | ACTL6A   | Q3TF62   | 48 kDa  | 2 |
| T-complex protein 1 subunit beta                                            | CCT2     | P80314   | 57 kDa  | 2 |
| Transcriptional activator protein Pur-alpha                                 | PURA     | P42669   | 35 kDa  | 2 |
| THO complex subunit 5 homolog                                               | THOC5    | Q8BKT7   | 79 kDa  | 2 |
| Capping protein (Actin filament) muscle Z-line, beta (CAPZB3)               | CAPZB    | A2AMV7   | 34 kDa  | 2 |
| Zfx1b zinc finger homeobox 1b                                               | ZEB2     | Q3T921   | 137 kDa | 2 |
| H1 histone family, member X                                                 | H1FX     | Q80ZM5   | 20 kDa  | 2 |
| Tubulin beta-2C chain                                                       | TUBB2C   | P68372   | 50 kDa  | 2 |

|                                                                                          |          |         |         |   |
|------------------------------------------------------------------------------------------|----------|---------|---------|---|
| MKIAA1637 protein (Nuclear receptor coactivator 5)                                       | NCOA5    | Q69ZE0  | 39 kDa  | 2 |
| 60S ribosomal protein L14                                                                | RPL14    | Q9CR57  | 24 kDa  | 2 |
| Putative uncharacterized protein (Splicing factor, arginine/serine-rich 6)               | SFRS6    | Q3TWWW8 | 39 kDa  | 2 |
| 40S ribosomal protein S7                                                                 | RPS7     | P62082  | 22 kDa  | 2 |
| Probable ATP-dependent RNA helicase DDX47                                                | DDX47    | Q9CWX9  | 51 kDa  | 2 |
| Proline-, glutamic acid- and leucine-rich protein 1                                      | PELP1    | Q56B11  | 119 kDa | 2 |
| Transcription factor DLX6                                                                | DLX6     | A5HKN2  | 33 kDa  | 2 |
| Zinc finger protein 768                                                                  | ZNF768   | Q8R0T2  | 63 kDa  | 2 |
| PHD finger protein 8                                                                     | PHF8     | Q80TJ7  | 114 kDa | 2 |
| Putative uncharacterized protein (Structural maintenance of chromosomes protein 2)       | SMC2     | Q3ULS2  | 139 kDa | 2 |
| 60S ribosomal protein L3                                                                 | RPL3     | P21531  | 46 kDa  | 2 |
| Propionyl-CoA carboxylase beta chain, mitochondrial                                      | PCCB     | P07633  | 59 kDa  | 2 |
| PHD finger protein 6                                                                     | PHF6     | B1B0W7  | 51 kDa  | 2 |
| Bromodomain adjacent to zinc finger domain protein 1A                                    | BAZ1A    | O88379  | 178 kDa | 2 |
| POZ (BTB) and AT hook containing zinc finger 1                                           | PATZ1    | Q5NBY9  | 74 kDa  | 2 |
| DNA-directed RNA polymerases I, II, and III subunit RPABC1                               | POLR2E   | Q80UW8  | 25 kDa  | 2 |
| 60S ribosomal protein L8                                                                 | RPL8     | P62918  | 28 kDa  | 2 |
| Helicase-like transcription factor                                                       | HLTF     | Q6PCN7  | 113 kDa | 2 |
| RNA-binding protein 26                                                                   | RBM26    | Q6NZN0  | 114 kDa | 2 |
| GC-rich sequence DNA-binding factor homolog                                              | GCFC     | P58501  | 105 kDa | 2 |
| Putative uncharacterized protein (General transcription factor IIIC, polypeptide 3)      | GTF3C3   | Q3TMP1  | 101 kDa | 2 |
| Tropomodulin-2                                                                           | TMOD2    | P70566  | 39 kDa  | 2 |
| U4/U6 small nuclear ribonucleoprotein Prp31                                              | PRPF31   | Q8CCF0  | 55 kDa  | 2 |
| Splicing factor U2AF 65 kDa subunit                                                      | U2AF2    | P26369  | 54 kDa  | 2 |
| 40S ribosomal protein S10                                                                | RPS10    | P63325  | 19 kDa  | 2 |
| Histone H1.4                                                                             | HIST1H1E | P43274  | 22 kDa  | 2 |
| Nuclear cap-binding protein subunit 1                                                    | NCBP1    | Q3UYV9  | 92 kDa  | 2 |
| 40S ribosomal protein S9                                                                 | RPS9     | Q6ZWN5  | 23 kDa  | 2 |
| Eukaryotic initiation factor 4A-II                                                       | EIF4A2   | P10630  | 46 kDa  | 2 |
| Putative uncharacterized protein (RNA-binding protein 7)                                 | RBM7     | Q3U5M9  | 23 kDa  | 2 |
| H/ACA ribonucleoprotein complex subunit 2                                                | NHP2     | Q9CRB2  | 17 kDa  | 2 |
| COUP transcription factor 2                                                              | NR2F2    | O09018  | 46 kDa  | 2 |
| Splicing factor, arginine/serine-rich 2                                                  | SFRS2    | Q62093  | 25 kDa  | 2 |
| SAFB-like transcription modulator                                                        | SLTM     | Q8CH25  | 117 kDa | 2 |
| Neuronal migration protein doublecortin                                                  | DCX      | O88809  | 41 kDa  | 2 |
| 40S ribosomal protein S4                                                                 | RPS4     | P47961  | 30 kDa  | 2 |
| T-complex protein 1 subunit zeta                                                         | CCt6A    | P80317  | 58 kDa  | 2 |
| Putative RNA methyltransferase NOL1                                                      | NOL1     | Q922K7  | 87 kDa  | 2 |
| Putative uncharacterized protein (XRCC1)                                                 | XRCC1    | Q3TGI0  | 69 kDa  | 2 |
| Protein KIAA1967 homolog                                                                 | Unknown  | Q8VDP4  | 103 kDa | 2 |
| Putative uncharacterized protein (Pre-mRNA-splicing factor SYF1 (XPA-binding protein 2)) | XAB2     | Q3UKP5  | 100 kDa | 2 |
| Putative uncharacterized protein (Nucleolar complex protein 2 homolog)                   | NOC2L    | Q3UZL6  | 80 kDa  | 2 |
| T-complex protein 1 subunit theta                                                        | CTC8     | P42932  | 60 kDa  | 2 |
| ELAV-like protein 3                                                                      | ELAVL3   | Q60900  | 40 kDa  | 2 |
| Myosin-Va                                                                                | MYO5A    | Q99104  | 216 kDa | 2 |
| Homeobox protein cut-like 1                                                              | CUX1     | P53564  | 166 kDa | 2 |
| Casein kinase II subunit alpha                                                           | CSNK2A1  | P19139  | 45 kDa  | 2 |
| Serrate RNA effector molecule homolog (Ars2)                                             | SRRT     | Q99MR6  | 100 kDa | 2 |
